# Supplementary material
Source: PubMed Central journal article supplement (PMC5774250)
Supplement: en-159-710-sf1.pdf [file en-159-710-sf1.pdf]

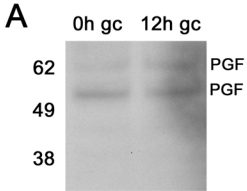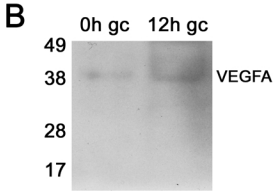

Supplemental Figure 1

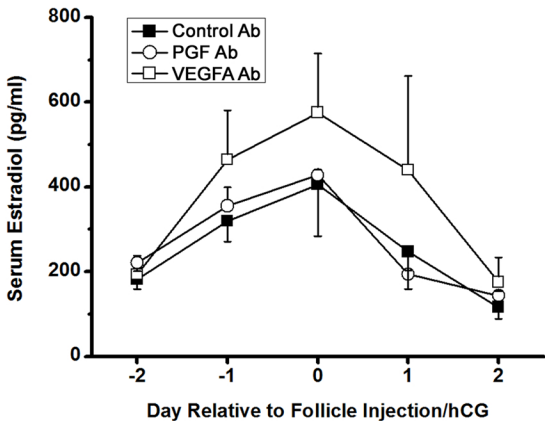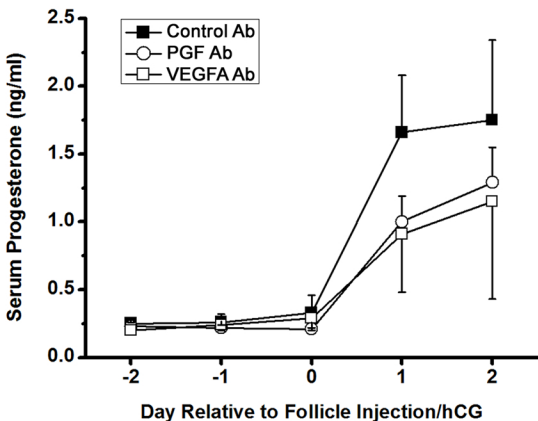

Supplemental Figure 2

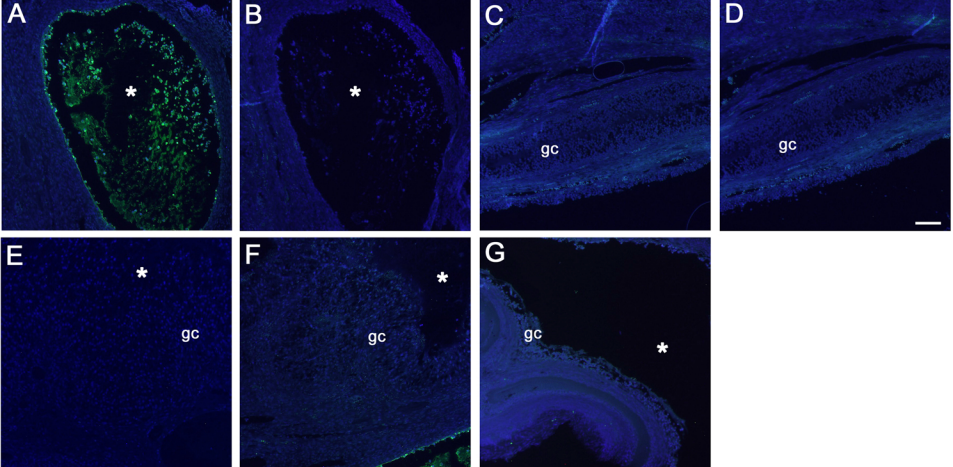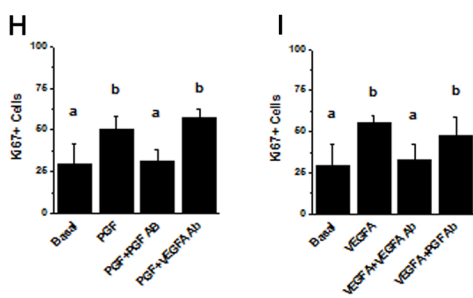

Supplemental Figure 3

**Control Ab**

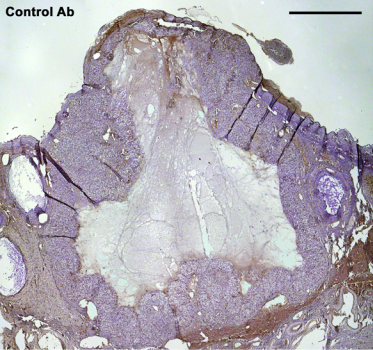

**PGF Ab**

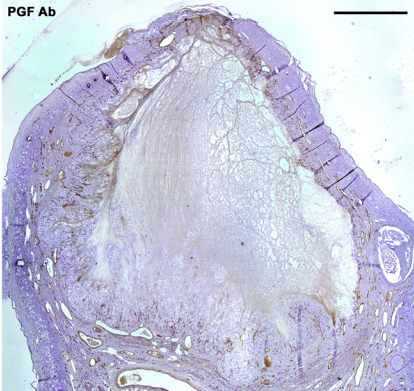

**VEGFA Ab**

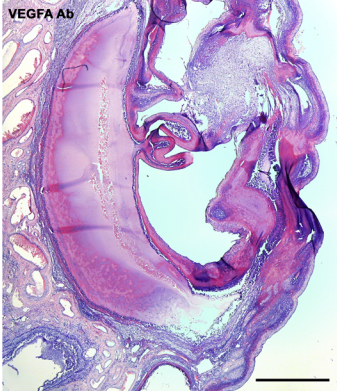

**Supplemental Figure 4**
